# Supplementary material for: Diversity of antibiotic-resistance genes in Canadian isolates of Aeromonas salmonicida subsp. salmonicida: dominance of pSN254b and discovery of pAsa8
Source: PubMed Central journal article supplement (PMC5067588; doi:10.1038/srep35617), 2016-10-18
Supplement: srep35617-s1.pdf [file srep35617-s1.pdf]

**Diversity of antibiotic-resistance genes in Canadian isolates of *Aeromonas salmonicida*  
subsp. *salmonicida*: dominance of pSN254b and discovery of pAsa8**

Mélanie V. Trudel<sup>1,2,3\*</sup>, Antony T. Vincent<sup>1,2,3\*</sup>, Sabrina A. Attéré<sup>1,2,3</sup>, Myriam Labbé<sup>1,2,4</sup>,  
Nicolas Derome<sup>1,5</sup>, Alexander I. Culley<sup>1,2,4</sup> and Steve J. Charette<sup>1,2,3,#</sup>

1. Institut de Biologie Intégrative et des Systèmes (IBIS), Université Laval, Quebec City, QC, Canada, G1V 0A6
2. Département de biochimie, de microbiologie et de bio-informatique, Faculté des sciences et de génie, Université Laval, Quebec City, QC, Canada, G1V 0A6
3. Centre de recherche de l'Institut universitaire de cardiologie et de pneumologie de Québec (IUCPQ), Quebec City, QC, Canada, G1V 4G5
4. Groupe de Recherche en Écologie Buccale (GREB), Faculté de médecine dentaire, Université Laval, Quebec City, QC, Canada, G1V 0A6
5. Département de biologie, Faculté des sciences et de génie, Université Laval, Quebec City, QC, Canada, G1V 0A6

#To whom correspondence should be addressed: Institut de Biologie Intégrative et des Systèmes (IBIS), Pavillon Charles-Eugène-Marchand, 1030 avenue de la Médecine, Université Laval, Quebec City, QC, Canada, G1V 0A6

[steve.charette@bcm.ulaval.ca](mailto:steve.charette@bcm.ulaval.ca); Telephone: 1-418-656-2131, ext. 6914; Fax: 1-418-656-7176

\*These authors contributed equally to this work.

Running title: *A. salmonicida*: pSN254b dominance and pAsa8 discovery

**Supplementary Table S1. Primers used in this study**

| Primer                                                           | Sequence (5'-3')          | Reference |
|------------------------------------------------------------------|---------------------------|-----------|
| <b>PCR positive control (<i>tapA</i> gene on the chromosome)</b> |                           |           |
| <i>tapA</i> F                                                    | ACATGAAGAAGCAATCAGGC      | 1         |
| <i>tapA</i> R                                                    | AGAGGTCATGCGTTAGCAG       | 1         |
| <b>PCR for the detection of pAB5S9</b>                           |                           |           |
| ORF101-strB_F1 <sup>a</sup>                                      | CTCGTGAATGTCGGTATCCTGTCT  | 2         |
| ORF101-strB_R1 <sup>a</sup>                                      | CTCGGTCGTGAGAACAATCTGATG  | 2         |
| parA-resA_F1                                                     | CGTCAATGATGATGTGGTCGTACC  | 2         |
| parA-resA_R1                                                     | CTGATCGACCAGGAAGGCTATAGC  | 2         |
| ORF397-tnp_F1                                                    | TGTTAGCACTCGGTTGCCTTCGAT  | 2         |
| ORF397-tnp_R1                                                    | GACATACACACCGTCGAGAAACAG  | 2         |
| <b>PCR for the detection of pSN254</b>                           |                           |           |
| tnp-urf2_F1 <sup>b</sup>                                         | CATTCGGTCGACCATACGACGATC  | 2         |
| tnp-urf2_R1 <sup>b</sup>                                         | CTGCGTGTGCTGCAAGGAAATCC   | 2         |
| traC_F1                                                          | CTACGACAATGGCTTGATCCAAGAC | 2         |
| traC_R1                                                          | GTACAGAATGGCAGGCAGTTGAGG  | 2         |
| ORF1417_F1                                                       | CGAGACCTTCCCTTTTACTGATGC  | 2         |
| ORF1417_R1                                                       | CAGACAGAGGACGAGTTGTAGAAC  | 2         |
| <b>PCR for the detection of pAsa4</b>                            |                           |           |
| DD1-pAsa4-traG-F1                                                | AGGTTGCTCTGGAAAGCCTCTGAT  | 2         |
| DD2-pAsa4-traG-R1                                                | TGTGGATGCCTGTGCTCTCCATTA  | 2         |
| <b>PCR for the characterization of pRAS3</b>                     |                           |           |
| Reg_1_F2                                                         | GGATAGTCGATCTGCTGGATACG   | 2         |

|                                              |                           |              |
|----------------------------------------------|---------------------------|--------------|
| Reg_1_R2                                     | CTACCCTGTGGAACACCTACATCT  | <sup>2</sup> |
| Reg_2_F1                                     | CGTTGTGGATGTGCTTCAGCAATC  | <sup>2</sup> |
| Reg_2_R1                                     | GAGTGGTTGAGCAATACAGGATGC  | <sup>2</sup> |
| <b>PCR for the characterization of pAsa8</b> |                           |              |
| Geno_pAsa8_F1b                               | CATGATGGTCACACCTCGATACTC  | This study   |
| Geno_pAsa8_R1                                | GCAATCCACTACTCAGTAGGTGAG  | This study   |
| Geno_pAsa8_F2b                               | GGAATCTGGTGGATGCGCATCTTC  | This study   |
| Geno_pAsa8_R2                                | CGTCTGATCCAAGAACAACCATCC  | This study   |
| Geno_pAsa8_F4                                | GTGATGATGTGAAATCTGCGTGGG  | This study   |
| Geno_pAsa8_R4                                | GCACTATCGCTTGCTTTCACCAGG  | This study   |
| Geno_pAsa8_F5                                | GCTTGCGGTCTACAGTGATATCTC  | This study   |
| Geno_pAsa8_R5                                | CGGTACTCAAATGCAACGCTACTAC | This study   |

a. The ORF101-strB primers were designed to give different amplicon sizes in pAB5S9 and pAB5S9b.

b. The tnp-urf2 primers were specific to pSN254b.

## References

- 1 Ebanks, R. O. *et al.* Expression of and secretion through the *Aeromonas salmonicida* type III secretion system. *Microbiology* **152**, 1275-1286, doi:152/5/1275 [pii]10.1099/mic.0.28485-0 (2006).
- 2 Vincent, A. T. *et al.* Detection of variants of the pRAS3, pAB5S9, and pSN254 plasmids in *Aeromonas salmonicida* subsp. *salmonicida*: multidrug resistance, interspecies exchanges, and plasmid reshaping. *Antimicrob Agents Chemother* **58**, 7367-7374, doi:10.1128/AAC.03730-14 (2014).

**Supplementary Table S2. *A. salmonicida* subsp. *salmonicida* isolates used in this study**

| Isolate   | Origin           |                     |                  | Date of isolation | Plasmids found by PCR genotyping | Genes found by multiplex PCR  | Plasmids <sup>b</sup> |       |       |        |       | Prophages <sup>c</sup> |      |      | <i>AsaGEI</i> <sup>c</sup> | Phenotypic assay <sup>d</sup> |         |           |
|-----------|------------------|---------------------|------------------|-------------------|----------------------------------|-------------------------------|-----------------------|-------|-------|--------|-------|------------------------|------|------|----------------------------|-------------------------------|---------|-----------|
|           | Fish             | Region <sup>a</sup> | Quebec subregion |                   |                                  |                               | pAsa1                 | pAsa2 | pAsa3 | pAsa11 | pAsa5 | 1                      | 2    | 3    |                            | A-layer                       | Lipases | Proteases |
| A449      | Brown trout      | France              |                  | 1975              | pAsa4                            | <i>cat, sul1, tetA(E)</i>     | +                     | +     | +     | None   | +     | +                      | +    | None | +                          | +                             | -       |           |
| 01-B522   | Brook trout      | Quebec (NW)         | NW-B             | 2001              | pAsa4-like ( <i>traG</i> +)      | <i>sul1, tetA(E)</i>          | +                     | +     | +     | +      | +     | +                      | +    | 1a   | +                          | +                             | +       |           |
| 01-B526   | Brook trout      | Quebec (NW)         | NW-C             | 2001              | -                                | -                             | +                     | +     | +     | +      | +     | +                      | +    | 1a   | +                          | +                             | +       |           |
| 01-B516   | Brook trout      | Quebec (NW)         | NW-H             | 2001              | -                                | -                             | +                     | +     | +     | +      | +     | +                      | +    | 2a   | +                          | +                             | +       |           |
| 07-9324   | Brook trout      | Quebec (NW)         | NW-B             | 2007              | pSN254b                          | <i>floR, sul1, sul2, tetA</i> | +                     | +     | +     | +      | +     | +                      | +    | 1a   | +                          | +                             | +       |           |
| 07-7817   | N/A <sup>e</sup> | Quebec (NW)         | NW-B             | 2007              | pSN254b                          | <i>floR, sul1, sul2, tetA</i> | +                     | +     | +     | +      | +     | +                      | +    | 1a   | +                          | +                             | +       |           |
| 07-7346   | Atlantic salmon  | Quebec (NE)         | NE-D             | 2007              | -                                | -                             | +                     | +     | +     | +      | +     | +                      | None | 2a   | +                          | +                             | +       |           |
| 07-5957   | Atlantic salmon  | Quebec (NE)         | NE-D             | 2007              | -                                | -                             | +                     | +     | +     | +      | +     | +                      | None | 2a   | +                          | +                             | +       |           |
| 07-7287   | Brook trout      | Quebec (SW)         | SW-C             | 2007              | pSN254b                          | <i>floR, sul1, sul2, tetA</i> | +                     | +     | +     | +      | +     | +                      | +    | 1a   | +                          | +                             | +       |           |
| 08-2647   | Brook trout      | Quebec (NW)         | NW-B             | 2008              | pSN254b                          | <i>floR, sul1, sul2, tetA</i> | +                     | +     | +     | +      | +     | +                      | +    | 1a   | +                          | +                             | +       |           |
| 08-2783   | Brook trout      | Quebec (SW)         | SW-C             | 2008              | pSN254b                          | <i>floR, sul1, sul2, tetA</i> | +                     | +     | +     | +      | +     | +                      | +    | 1a   | +                          | +                             | +       |           |
| 08-4188   | Brook trout      | Quebec (NW)         | NW-B             | 2008              | pSN254b                          | <i>floR, sul1, sul2, tetA</i> | +                     | +     | +     | +      | +     | +                      | +    | 1a   | +                          | +                             | +       |           |
| 09-0167   | Atlantic salmon  | Quebec (NE)         | NE-D             | 2009              | -                                | -                             | +                     | +     | +     | +      | +     | +                      | None | 2a   | +                          | +                             | +       |           |
| m17524-09 | Brook trout      | Quebec (NW)         | NW-B             | 7-Sep-09          | -                                | -                             | +                     | +     | +     | +      | +     | +                      | +    | 2a   | +                          | +                             | +       |           |
| m14349-09 | Atlantic salmon  | Quebec (NW)         | NW-B             | 04-aout-09        | pSN254b                          | <i>floR, sul1, sul2, tetA</i> | +                     | +     | +     | +      | +     | +                      | +    | 1a   | +                          | +                             | +       |           |

|           |                 |             |      |           |         |                               |   |   |   |   |   |   |   |   |   |    |   |   |   |
|-----------|-----------------|-------------|------|-----------|---------|-------------------------------|---|---|---|---|---|---|---|---|---|----|---|---|---|
| m23281-09 | Brook trout     | Quebec (NW) | NW-G | 03-dec-09 | -       | -                             | + | + | + | + | + | + | + | + | + | 2a | + | + | + |
| m23067-09 | Brook trout     | Quebec (NE) | NE-C | 01-dec-09 | -       | -                             | + | + | + | + | + | + | + | + | + | 2a | + | + | + |
| m19438-09 | Brook trout     | Quebec (NW) | NW-B | 13-Oct-09 | -       | -                             | + | + | + | + | + | + | + | + | + | 2a | + | + | + |
| m16583-09 | Brook trout     | Quebec (NW) | NW-B | 2-Sep-09  | -       | -                             | + | + | + | + | + | + | + | + | + | 2a | + | + | + |
| m14231-09 | Atlantic salmon | Quebec (NE) | NE-D | 13-Jul-09 | -       | -                             | + | + | + | + | + | + | + | + | + | 2a | + | + | + |
| m11743-09 | Brook trout     | Quebec (SW) | SW-C | 2-Jul-09  | -       | -                             | + | + | + | + | + | + | + | + | + | 2a | + | + | + |
| m11431-09 | Brook trout     | Quebec (SW) | SW-C | 30-Jun-09 | -       | -                             | + | + | + | + | + | + | + | + | + | 2a | + | + | + |
| m10419-09 | Brook trout     | Quebec (SW) | SW-C | 17-Jun-09 | -       | -                             | + | + | + | + | + | + | + | + | + | 2a | + | + | + |
| m9906-09  | Brook trout     | Quebec (SW) | SW-C | 11-Jun-09 | pSN254b | <i>floR, sul1, sul2, tetA</i> | + | + | + | + | + | + | + | + | + | 1a | + | + | + |
| m9954-10  | Brook trout     | Quebec (NW) | NW-B | 20-May-10 | -       | -                             | + | + | + | + | + | + | + | + | + | 1a | + | + | + |
| m8029-10  | Brook trout     | Quebec (NW) | NW-B | 28-Apr-10 | -       | -                             | + | + | + | + | + | + | + | + | + | 2a | + | + | + |
| m11603-10 | Brook trout     | Quebec (NW) | NW-B | 10-Jun-10 | -       | -                             | + | + | + | + | + | + | + | + | + | 2a | + | + | + |
| m6363-10  | Brook trout     | Quebec (NE) | NE-C | 7-Apr-10  | -       | -                             | + | + | + | + | + | + | + | + | + | 2a | + | + | + |
| m9221-10  | Brook trout     | Quebec (NE) | NE-C | 11-May-10 | -       | -                             | + | + | + | + | + | + | + | + | + | 2a | + | + | + |
| M10935-11 | Brook trout     | Quebec (NW) | NW-B | 2011      | -       | -                             | + | + | + | + | + | + | + | + | + | 2a | + | + | + |
| M15448-11 | Brook trout     | Quebec (NW) | NW-B | 2011      | pAsa8   | <i>floR, sul1, tetG, tetA</i> | + | + | + | + | + | + | + | + | + | 2a | + | + | + |
| M16474-11 | Brook trout     | Quebec (NW) | NW-B | 2011      | pAsa8   | <i>floR, sul1, tetG, tetA</i> | + | + | + | + | + | + | + | + | + | 2a | + | + | + |
| M19878-11 | Brook trout     | Quebec (NW) | NW-B | 2011      | -       | -                             | + | + | + | + | + | + | + | + | + | 2a | + | + | + |
| M11500-11 | Brook trout     | Quebec (NW) | NW-H | 2011      | -       | -                             | + | + | + | + | + | + | + | + | + | 2a | + | + | + |

|           |                 |             |      |           |         |                               |     |     |     |     |     |   |   |      |    |      |   |   |   |
|-----------|-----------------|-------------|------|-----------|---------|-------------------------------|-----|-----|-----|-----|-----|---|---|------|----|------|---|---|---|
| M16486-11 | Brook trout     | Quebec (NW) | NW-H | 2011      | -       | -                             | +   | +   | +   | +   | +   | + | + | +    | +  | 2a   | + | + | + |
| M13460-11 | Brook trout     | Quebec (SE) | SE-A | 2011      | -       | -                             | +   | +   | +   | +   | +   | + | + | +    | +  | 2a   | + | + | + |
| M13729-11 | Brook trout     | Quebec (SE) | SE-A | 2011      | -       | -                             | +   | +   | +   | +   | +   | + | + | +    | +  | 2a   | + | + | + |
| M14481-11 | Brook trout     | Quebec (SE) | SE-B | 2011      | pSN254b | <i>floR, sul1, sul2, tetA</i> | +   | +   | +   | +   | +   | + | + | +    | +  | 1a   | + | + | + |
| M15879-11 | Brook trout     | Quebec (SE) | SE-B | 2011      | pSN254b | <i>floR, sul1, sul2, tetA</i> | +   | +   | +   | +   | +   | + | + | +    | +  | 1a   | + | + | + |
| M17739-11 | Brook trout     | Quebec (SE) | SE-B | 2011      | pSN254b | <i>floR, sul1, sul2, tetA</i> | +   | +   | +   | +   | +   | + | + | +    | +  | 1a   | + | + | + |
| M13732-11 | Brook trout     | Quebec (SW) | SW-C | 2011      | pSN254b | <i>floR, sul1, sul2, tetA</i> | +   | +   | +   | +   | +   | + | + | +    | +  | 1a   | + | + | + |
| M17053-11 | Brook trout     | Quebec (SW) | SW-C | 2011      | pSN254b | <i>floR, sul1, sul2, tetA</i> | +   | +   | +   | +   | +   | + | + | +    | +  | 1a   | + | + | + |
| M15878-11 | Rainbow trout   | Quebec (SE) | SE-B | 2011      | -       | -                             | +   | +   | +   | +   | +   | + | + | +    | +  | 2a   | + | + | + |
| M13182-11 | Atlantic salmon | Quebec (NE) | NE-C | 2011      | -       | -                             | +   | +   | +   | +   | +   | + | + | +    | +  | 2a   | + | + | + |
| M17735-11 | Brook trout     | Quebec (NE) | NE-C | 2011      | -       | -                             | +   | +   | +   | +   | +   | + | + | +    | +  | 2a   | + | + | + |
| M15576-11 | Brown trout     | Quebec (NW) | NW-B | 2011      | -       | -                             | +   | +   | +   | +   | +   | + | + | None | 2a | +    | + | + |   |
| M15469-11 | Brook trout     | Quebec (NW) | NW-B | 2011      | pSN254b | <i>floR, sul1, sul2, tetA</i> | N/A | N/A | N/A | N/A | N/A | + | + | +    | +  | 1a   | + | + | + |
| M22710-11 | Brook trout     | Quebec (SW) | SW-C | 2011      | -       | -                             | +   | +   | +   | +   | +   | + | + | +    | +  | 2a   | + | + | + |
| M13764-11 | Brook trout     | Quebec (NW) | NW-G | 2011      | -       | -                             | +   | +   | +   | +   | +   | + | + | +    | +  | 2a   | + | + | + |
| M18076-11 | Lumpfish        | Quebec (SE) | SE-A | 2011      | -       | -                             | +   | +   | +   | +   | +   | + | + | +    | +  | None | + | + | + |
| M23911-11 | Brook trout     | Quebec (NW) | NW-B | 2011      | -       | -                             | +   | +   | +   | +   | +   | + | + | +    | +  | 1a   | + | + | + |
| M12357-12 | Brook trout     | Quebec (NW) | NW-B | 12-Jun-12 | pSN254b | <i>floR, sul1, sul2, tetA</i> | +   | +   | +   | +   | +   | + | + | +    | +  | 1a   | + | + | + |
| M21375-12 | Brook trout     | Quebec (NE) | NE-C | 4-Oct-12  | -       | -                             | +   | +   | +   | +   | +   | + | + | +    | +  | 2a   | + | + | + |

|            |                 |             |      |           |         |                               |   |   |   |   |   |   |   |   |   |    |   |     |   |
|------------|-----------------|-------------|------|-----------|---------|-------------------------------|---|---|---|---|---|---|---|---|---|----|---|-----|---|
| M16237-12  | Brook trout     | Quebec (NE) | NE-C | 1-Aug-12  | -       | -                             | + | + | + | + | + | + | + | + | + | 2a | + | +   | + |
| M12976-12  | Brook trout     | Quebec (NW) | NW-H | 19-Jun-12 | -       | -                             | + | + | + | + | + | + | + | + | + | 2a | + | +   | + |
| M22895-12  | Brook trout     | Quebec (NW) | NW-G | 25-Oct-12 | -       | -                             | + | + | + | + | + | + | + | + | + | 2a | + | +   | + |
| M10745-12  | Brown trout     | Quebec (NW) | NW-B | 4-May-12  | pSN254b | <i>floR, sul1, sul2, tetA</i> | + | + | + | + | + | + | + | + | + | 1a | + | +   | + |
| M9754-12   | Brook trout     | Quebec (NW) | NW-G | 11-May-12 | -       | -                             | + | + | + | + | + | + | + | + | + | 2a | + | +   | + |
| M17930-12  | Brook trout     | Quebec (SW) | SW-C | 23-Aug-12 | -       | -                             | + | + | + | + | + | + | + | + | + | 1a | + | +   | + |
| M12418-12  | Brook trout     | Quebec (NW) | NW-B | 13-Jun-12 | -       | -                             | + | + | + | + | + | + | + | + | + | 2a | + | +   | + |
| M21368-12  | Brook trout     | Quebec (NW) | NW-C | 4-Oct-12  | -       | -                             | + | + | + | + | + | + | + | + | + | 2a | + | +   | + |
| M13050-12  | Brook trout     | Quebec (NW) | NW-H | 27-Jun-12 | pSN254b | <i>floR, sul1, sul2, tetA</i> | + | + | + | + | + | + | + | + | + | 2a | + | +   | + |
| M13566-12  | Brook trout     | Quebec (SE) | SE-B | 27-Jun-12 | pSN254b | <i>floR, sul1, sul2, tetA</i> | + | + | + | + | + | + | + | + | + | 1a | + | +   | + |
| M14404-12  | Atlantic salmon | Quebec (NE) | NE-C | 10-Jul-12 | -       | -                             | + | + | + | + | + | + | + | + | + | 2a | + | +   | + |
| M16671-12  | Brook trout     | Quebec (NW) | NW-H | 7-Aug-12  | -       | -                             | + | + | + | + | + | + | + | + | + | 2a | + | +   | + |
| M16042-12  | Brook trout     | Quebec (SE) | SE-B | 30-Jul-12 | pSN254b | <i>floR, sul1, sul2, tetA</i> | + | + | + | + | + | + | + | + | + | 1a | + | +   | + |
| SHY13-162  | Brook trout     | Quebec (NE) | NE-C | 25-Jan-13 | -       | -                             | + | + | + | + | + | + | + | + | + | 2a | + | +   | + |
| SHY13-574  | Brook trout     | Quebec (NE) | NE-C | 25-Feb-13 | -       | -                             | + | + | + | + | + | + | + | + | + | 2a | + | (+) | + |
| SHY13-1470 | Brook trout     | Quebec (NW) | NW-H | 9-May-13  | -       | -                             | + | + | + | + | + | + | + | + | + | 2a | + | +   | + |
| SHY13-2188 | Brook trout     | Quebec (NW) | NW-B | 28-Jun-13 | pSN254b | <i>floR, sul1, sul2, tetA</i> | + | + | + | + | + | + | + | + | + | 1a | + | +   | + |
| SHY13-2222 | Brook trout     | Quebec (NE) | NE-C | 3-Jul-13  | -       | -                             | + | + | + | + | + | + | + | + | + | 2a | + | -   | + |
| SHY13-2257 | Brook trout     | Quebec (NW) | NW-G | 8-Jul-13  | -       | -                             | + | + | + | + | + | + | + | + | + | 2a | + | +   | + |

|              |                 |               |      |           |                                  |                               |   |   |   |   |   |   |   |   |      |      |   |   |   |
|--------------|-----------------|---------------|------|-----------|----------------------------------|-------------------------------|---|---|---|---|---|---|---|---|------|------|---|---|---|
| SHY13-2263   | Brook trout     | Quebec (NW)   | NW-H | 8-Jul-13  | -                                | -                             | + | + | + | + | + | + | + | + | +    | 2a   | + | + | + |
| SHY13-2317   | Brook trout     | Quebec (SE)   | SE-B | 12-Jul-13 | -                                | -                             | + | + | - | + | + | + | + | + | +    | None | + | + | + |
| SHY13-2425   | Brook trout     | Quebec (SW)   | SW-C | 22-Jul-13 | -                                | -                             | + | + | - | + | + | + | + | + | +    | None | + | + | + |
| SHY13-2458   | Brook trout     | Quebec (NW)   | NW-B | 22-Jul-13 | pSN254b                          | <i>floR, sul1, sul2, tetA</i> | + | + | + | + | + | + | + | + | +    | 1a   | + | + | + |
| SHY13-2534   | Atlantic salmon | Quebec (NE)   | NE-D | 31-Jul-13 | -                                | -                             | + | + | + | + | + | + | + | + | None | 2a   | + | + | + |
| SHY13-2627   | Brook trout     | Quebec (NW)   | NW-H | 9-Aug-13  | pAsa4-like<br>( <i>traG</i> +) ) | <i>sul1, tetA(E)</i>          | + | + | + | + | + | + | + | + | +    | 2a   | + | + | + |
| SHY13-2630   | Brook trout     | Quebec (NW)   | NW-B | 9-Aug-13  | pSN254b                          | <i>floR, sul1, sul2, tetA</i> | + | + | + | + | + | + | + | + | +    | 1a   | + | + | + |
| SHY13-2825   | Brook trout     | Quebec (SE)   | SE-B | 20-Aug-13 | -                                | -                             | + | + | + | + | + | + | + | + | +    | None | + | - | + |
| SHY13-2873   | Brook trout     | Quebec (SW)   | SW-C | 22-Aug-13 | -                                | -                             | + | + | + | + | + | + | + | + | +    | None | + | + | + |
| SHY13-2909   | Brook trout     | Quebec (NW)   | NW-H | 27-Aug-13 | -                                | -                             | + | + | + | + | + | + | + | + | +    | 2a   | + | + | + |
| SHY13-3101   | Brook trout     | Quebec (SW)   | SW-C | 12-Sep-13 | -                                | -                             | + | + | + | + | + | + | + | + | +    | 1a   | + | + | + |
| SHY13-3127   | Brook trout     | Quebec (NW)   | NW-B | 12-Sep-13 | -                                | -                             | + | + | + | + | + | + | + | + | +    | 2a   | + | + | + |
| SHY13-3795   | Brook trout     | Quebec (SW)   | SW-C | 23-Oct-13 | pSN254b                          | <i>floR, sul1, sul2, tetA</i> | + | + | + | - | + | + | + | + | +    | 1a   | + | + | + |
| SHY13-3798   | Brook trout     | Quebec (NW)   | NW-H | 23-Oct-13 | -                                | -                             | + | + | + | + | + | + | + | + | +    | 2a   | + | + | + |
| SHY13-3799   | Brook trout     | Quebec (NW)   | NW-H | 23-Oct-13 | pAsa4-like<br>( <i>traG</i> +) ) | <i>sul1, tetA(E)</i>          | + | + | + | + | + | + | + | + | +    | 2a   | + | + | + |
| 2004-05 MF26 | N/A             | New Brunswick |      | 2004      | pSN254b                          | <i>floR, sul1, sul2, tetA</i> | + | + | + | + | + | + | + | + | +    | 2a   | + | + | + |
| 2005-175 K2  | Brook trout     | New Brunswick |      | 2005      | -                                | -                             | + | + | + | + | + | + | + | + | +    | 2a   | + | + | + |
| 2009-178 K9  | Atlantic salmon | New Brunswick |      | 2009      | -                                | -                             | + | + | + | + | + | + | + | + | +    | 2a   | + | + | + |



|              |                 |               |  |      |                                |                                            |   |   |   |   |   |   |   |   |   |    |   |   |   |
|--------------|-----------------|---------------|--|------|--------------------------------|--------------------------------------------|---|---|---|---|---|---|---|---|---|----|---|---|---|
| 2009-157 K5  | Brook trout     | New Brunswick |  | 2009 | pRAS3                          | <i>tetA(C)</i>                             | + | + | + | + | + | + | + | + | + | 2a | + | + | + |
| 2009-195 K29 | Brook trout     | New Brunswick |  | 2009 | pRAS3                          | <i>tetA(C)</i>                             | + | + | + | + | + | + | + | + | + | 2a | + | + | + |
| 2009-144 K3  | Brook trout     | New Brunswick |  | 2009 | pAB5S9b,<br>pRAS3              | <i>floR, sul2, tetH,</i><br><i>tetA(C)</i> | + | + | + | + | + | + | + | + | + | 2a | + | + | + |
| 2010-47 K18  | Brook trout     | New Brunswick |  | 2010 | pAB5S9b,<br>pRAS3              | <i>floR, sul2, tetH,</i><br><i>tetA(C)</i> | + | + | + | + | + | + | + | + | + | 2a | + | + | + |
| 2004-68 K52  | Atlantic salmon | Nova Scotia   |  | 2004 | pSN254b                        | <i>floR, sul1, sul2, tetA</i>              | + | + | + | + | + | + | + | + | + | 2a | + | + | + |
| RS 1458      | Rainbow trout   | Ontario       |  | 1993 | pAsa4-like<br>( <i>traG+</i> ) | <i>tetA(E)</i>                             | + | + | + | + | + | + | + | + | + | 2a | + | + | + |
| RS 1706      | Chinook salmon  | Ontario       |  | 2000 | -                              | -                                          | + | + | + | + | + | + | + | + | + | 2a | + | + | + |
| RS 1705      | Brook trout     | Ontario       |  | 2000 | -                              | -                                          | + | + | + | + | + | + | + | + | + | 1a | + | + | + |
| RS 1744      | Coho salmon     | Ontario       |  | 2000 | -                              | -                                          | + | + | + | + | + | + | + | + | + | 2a | + | + | + |
| RS 1752      | Pumpkinseed     | Ontario       |  | 2001 | -                              | -                                          | + | + | + | + | + | + | + | + | + | 1b | + | + | + |
| RS 1835      | Coho salmon     | Ontario       |  | 2011 | -                              | -                                          | + | + | + | - | + | + | + | + | + | 2a | + | + | + |

- a. NW = northwest, SW = southwest, NE = northeast, SE = southeast (see Figure 4).
- b. See : Attère SA, et al. Diversity and Homogeneity among Small Plasmids of *Aeromonas salmonicida* subsp. *salmonicida* Linked with Geographical Origin. *Front Microbiol* 6: 1274. (2015)
- c. See: Emond-Rheault JG, et al. Variants of a genomic island in *Aeromonas salmonicida* subsp. *salmonicida* link isolates with their geographical origins. *Vet Microbiol* 175: 68-76. (2015)
- d. See: Daher, R. K. et al. Alteration of virulence factors and rearrangement of pAsa5 plasmid caused by the growth of *Aeromonas salmonicida* in stressful conditions. *Vet Microbiol* 152, 353-360 (2011).
- e. N/A: Not available
